# Supplementary material for: Percutaneous Transluminal Angioplasty and Drug-Eluting Stents for Infrapopliteal Lesions in Critical Limb Ischemia (PADI) Trial
Source: PubMed Central journal article supplement — Circ Cardiovasc Interv. 2016 Feb 16;9(2):e002376. doi: 10.1161/CIRCINTERVENTIONS.114.002376 (PMC4753788; doi:10.1161/circinterventions.114.002376), 2016-02-16
Supplement: hcv-9-e002376-s001.pdf [file hcv-9-e002376-s001.pdf]

**Percutaneous Transluminal Angioplasty versus Drug Eluting Stents  
for Infrapopliteal Lesions in Critical Limb Ischemia, PADI trial**

**SUPPLEMENTAL MATERIAL**

**Supplemental Tables**

### Supplemental table 1A. Inclusion criteria

---

#### Inclusion criteria

---

- Age > 18 years.
  
  - If female patient with child-bearing potential, patient may not be pregnant at the study entry and must utilize reliable birth control for the duration of her participation in the study.
  
  - Patient is willing and able to comply with the specified follow-up evaluation.
  
  - Critical limb ischemia, defined as Rutherford category 4 (ischemic rest pain), 5 (minor tissue loss), or 6 (major tissue loss).
  
  - Stenosis (>50% luminal loss) or occlusion of an infrapopliteal artery, including the tibiofibular trunk, the anterior tibial artery, the posterior tibial artery, and the peroneal artery.
  
  - Target lesion length  $\leq 90$  mm.
  
  - Artery to be treated with a diameter  $\geq 2$  mm and  $\leq 6$  mm.
  
  - Patent common iliac, external iliac, superficial femoral and popliteal artery on the ipsilateral side prior to randomization, possibly after treatment during the same session.
  
  - At least 1 patent crural (anterior tibial, posterior tibial, or peroneal) artery with expected unobstructed runoff to ankle level after treatment.
-

## Supplemental table 1B. Exclusion criteria

---

### Exclusion criteria

---

- Acute limb ischemia.
- Previous amputation of affected limb at or above ankle level.
- Subacute limb ischemia which requires thrombolysis as first treatment modality.
- Active bleeding or bleeding diathesis.
- Recent ( $\leq 3$  months) hemorrhagic stroke or any other CNS abnormality with increased risk of hemorrhage, such as intracranial neoplasm, arteriovenous malformation, intracranial aneurysm, or aneurysm repair.
- Gastrointestinal or genitourinary bleeding of clinical significance within the previous 6 weeks before treatment.
- Aneurysm in common femoral, superficial femoral, or popliteal artery on the ipsilateral side.
- Surgical revascularization involving the same limb within 30 days prior to the index procedure or planned surgical revascularization of the same limb within 30 days of the index procedure.
- Previous implanted stent at the index site.
- Life expectancy of less than 6 months or other factors making clinical follow-up difficult.
- Known allergy to acetylsalicylic acid (aspirin), clopidogrel, heparin, or paclitaxel.
- Known allergy to contrast media.
- Known heparin-induced thrombocytopenia (HIT type 2).
- Patient unable or unwilling to tolerate anticoagulant, anti-platelet therapy or contrast media.
- Creatinine clearance 20 mL/minute (as derived from Cockcroft-Gault formula).
- Severely calcified lesions with expected resistance to stenting.

- Poor inflow due to ipsilateral stenoses or occlusions of the iliac or femoropopliteal arteries that cannot be treated during the same session.
  - Significant vessel tortuosity or other parameters prohibiting access to the lesions and/or delivery of the stent.
  - Patients without (expected) distal runoff to the index site.
-

**Supplemental table 2. Mean Rutherford score, ankle brachial index and toe pressure at 6 and 12 months post treatment**

|                             | PTA±BMS     | DES         | p value * |
|-----------------------------|-------------|-------------|-----------|
| <b>Rutherford score</b>     |             |             |           |
|                             | n=43 limbs  | n=53 limbs  |           |
| mean (s.e.) at month 6      | 2.81 (0.32) | 3.11 (0.29) | 0.49      |
|                             | n=37 limbs  | n=45 limbs  |           |
| mean (s.e.) at month 12     | 1.81 (0.34) | 1.87 (0.30) | 0.90      |
| <b>Ankle brachial index</b> |             |             |           |
|                             | n=32 limbs  | n=39 limbs  |           |
| mean (s.e.) at month 6      | 0.83 (0.05) | 0.85 (0.04) | 0.74      |
|                             | n=26 limbs  | n=33 limbs  |           |
| mean (s.e.) at month 12     | 0.91 (0.06) | 0.94 (0.07) | 0.74      |
| <b>Toe pressure (mmHg)</b>  |             |             |           |
|                             | n=34 limbs  | n=40 limbs  |           |
| mean (s.e.) at month 6      | 63.7 (6.2)  | 69.5 (5.7)  | 0.49      |
|                             | n=24 limbs  | n=31 limbs  |           |
| mean (s.e.) at month 12     | 78.1 (6.6)  | 78.3 (6.2)  | 0.98      |

\* T-test.

PTA: percutaneous transluminal angioplasty; BMS: bare metal stent; DES: drug-eluting stent, s.e.: standard error.

**Supplemental table 3. Complications and serious adverse events**

|                                       | PTA±BMS<br>n=66 limbs | DES<br>n=74 limbs | p value* |
|---------------------------------------|-----------------------|-------------------|----------|
| <b>Periprocedural complications †</b> |                       |                   |          |
| Hematoma                              | 8 (12.1)              | 7 (9.5)           | 0.61     |
| Material dysfunction                  | 0                     | 3 (4.1)           | 0.10     |
| Acute thrombosis                      | 4 (6.1)               | 5 (6.8)           | 0.87     |
| Distal emboli                         | 3 (4.5)               | 4 (5.4)           | 0.82     |
| Pseudo aneurysm                       | 0                     | 1 (1.4)           | 0.34     |
| <b>Complications until 12 months</b>  |                       |                   |          |
| Acute thrombosis                      | 1 (1.5)               | 0                 | 0.29     |
| Wound infection                       | 3 (4.5)               | 8 (10.8)          | 0.17     |
| <b>Serious adverse events</b>         |                       |                   |          |
| Gastrointestinal bleeding             | 3 (4.5)               | 2 (2.7)           | 0.56     |
| Ischemic cerebral event               | 1 (1.5)               | 2 (2.7)           | 0.63     |
| Cerebral hemorrhage                   | 2 (3.0)               | 0                 | 0.13     |
| Pneumonia                             | 1 (1.5)               | 3 (4.1)           | 0.37     |
| Decubitus                             | 1 (1.5)               | 0                 | 0.29     |
| Cardiac disease                       | 1 (1.5)               | 5 (6.8)           | 0.13     |
| Renal failure                         | 2 (3.0)               | 1 (1.4)           | 0.49     |
| Non CLI related infection             | 4 (6.1)               | 2 (2.7)           | 0.33     |

Values are number (%). \*Chi-square test. †<30 days post procedural.

PTA: percutaneous transluminal angioplasty; BMS: bare metal stent; DES: drug-eluting stent; CLI: critical limb ischemia.
